# Supplementary material for: CD3xCD19 DART molecule treatment induces non-apoptotic killing and is efficient against high-risk chemotherapy and venetoclax-resistant chronic lymphocytic leukemia cells
Source: PubMed Central journal article supplement — J Immunother Cancer. 2020 Jun 19;8(1):e000218. doi: 10.1136/jitc-2019-000218 (PMC7319711; doi:10.1136/jitc-2019-000218), 2020-06-19

**Supplementary figure 1**

(A) HD PBMCs were CTV labelled and left unstimulated or in the presence of 100ng/mL CD3xCD19 DART or aCD3/aCD28 antibodies. CD71 expression was measured after 4 days. (n=4) (B-C) FACS analysis of lysis of CTV labelled CD19+ cell-lines cocultured with healthy donor T cells in presence of CD3x19 DART. Lysis of Daudi (n=2) and JeKo-1 (n=4) cell-line in 4:1 E:T ratio after 4 days. Figures B and C represent different T cell donors. (D-G) %Dead cells of CTV labelled primary CLL cocultured with healthy donor T cells in presence of CD3xCD19 or CD3xFITC DART. Figure represents raw data from figures 2A-B (D-E) Primary CLL cells cocultured in different 1:1 (D) or 4:1 (E) E:T ratios and with different concentrations of the CD3xFITC and CD3xCD19 DART molecules for 24h(n=3) (F-G) Primary CLL cells cocultured in different 1:1 (F) or 4:1 (G) E:T ratios and with different concentrations of the CD3xFITC and CD3xCD19 DART molecules for 4 days (n=3). (H-I) FACS analysis of lysis of CTV labelled primary CLL cocultured with healthy donor T cells in presence of CD3xCD19 DART. (H) Lysis of unmutated IGHV (n=5), mutated IGVH (n=4), chemorefractory (n=6) and TP53 mutated/17p deleted (n=4) CLL by HD T cells in 4:1 E:T ratio after 4 days. Figure represents different T cell donor than used in Fig 2C. (I) Lysis of venetoclax refractory (n=1) and ibrutinib refractory (n=2) CLL by HD T cells in 4:1 E:T ratio after 4 days. Donor A and B represent two different T cell donors (J) HD\* or CLL PBMCs were CTV labelled and left unstimulated or in the presence of 100ng/mL CD3xCD19 DART or aCD3/aCD28 antibodies. CD71 expression was measured after 4 days. (n=4) \*Data from HD PBMCs equal to data in figure S1A.

Supplemental Figure 1

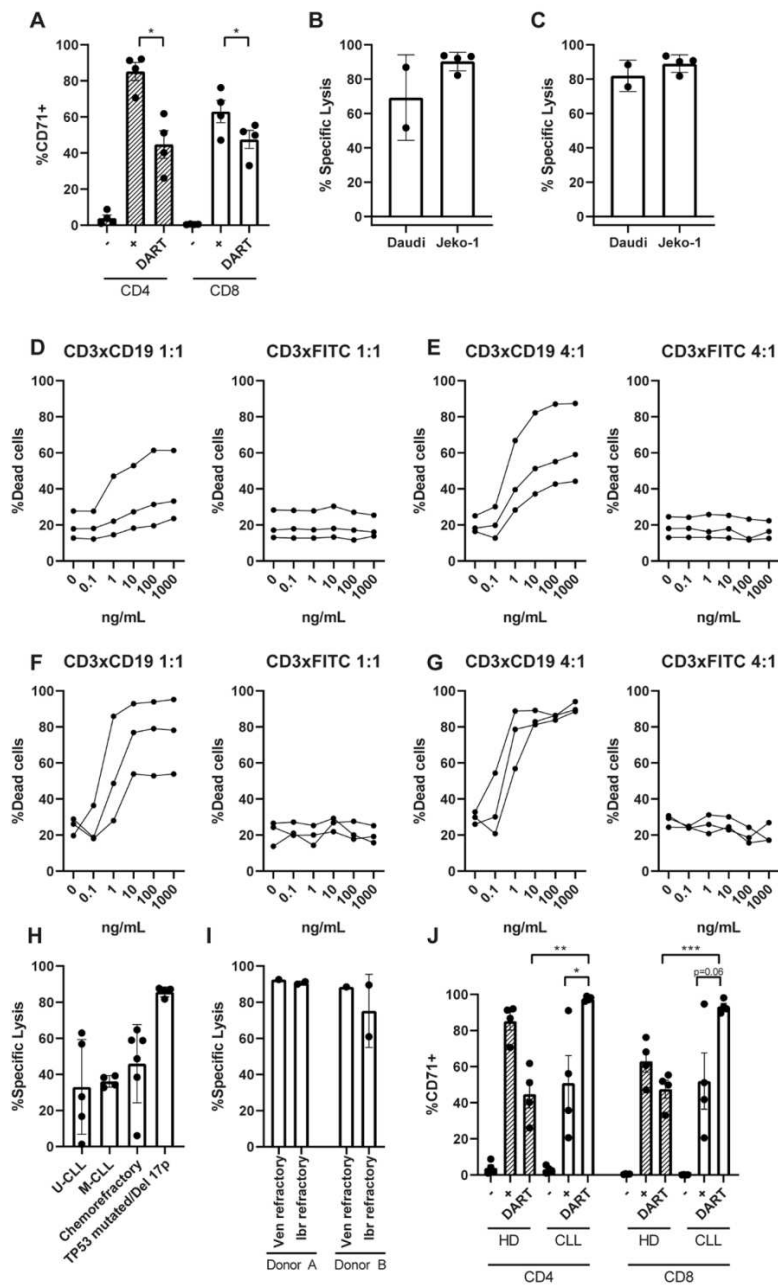

59  
60  
61  
62

Supplementary figure 2

(A) CD40 activation of primary CLL was confirmed by measuring resistance to treatment with 0.01uM ABT-199 for 24h (n=6). (B) Knock-out of BAX and BAK was confirmed by western blot in 4 JeKo-1 clones. (C-D) Viability was assessed of 3T3 (dashed bars) or 3T40 treated (empty bars) CLL cells treated for 24h with ABT-199 and QVD (n=3) (C) or for 48h with CD3xCD19 DART and QVD with HD T cells in a 4:1 ratio (D) (n=2-3). (E) Specific lysis of JeKo-1 cells treated for 24h with 10uM ABT-199 in presence or absence of QVD or co-cultured with HD T cells in 4:1 ratio and 100ng/mL CD3xCD19 DART for 24h in presence or absence of QVD (n=3-6).

Supplemental Figure 2

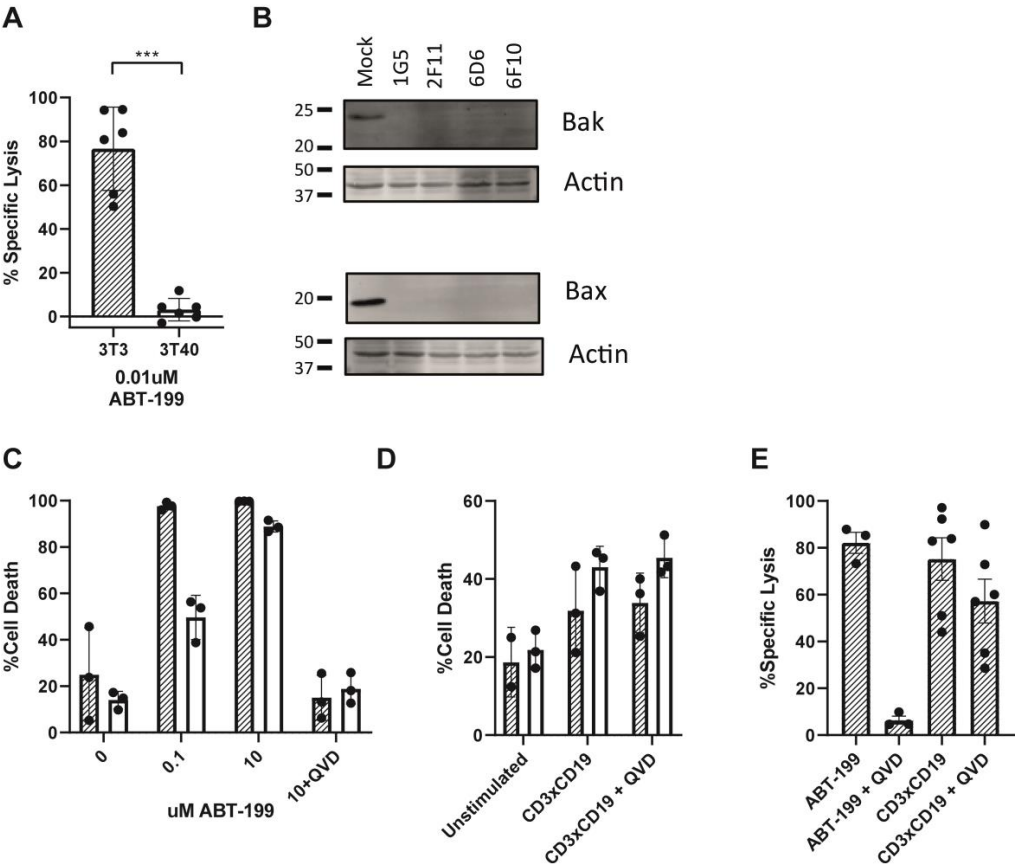

Supplement: jitc-2019-000218supp001.pdf [file jitc-2019-000218supp001.pdf]
